# Supplementary material for: Dissociation and aggregation behaviors of starch in choline amino acid ionic liquid solvents: the anion structure effect
Source: Royal Society of Chemistry journal article supplement (doi:10.1039/d4cp03626c), 2025-01-01
Supplement: d4cp03626c1.pdf [file d4cp03626c1.pdf]

## Dissociation and aggregation behaviors of starch in choline amino acid ionic liquid solvents: the anion structure effect

### 1. The structure information of normal corn starch

The ATR-FTIR spectrum of normal corn starch is shown in Fig.S1. Starch exhibits a strong, broad absorption peak around  $3200\text{ cm}^{-1}$ , which corresponds to the stretching vibration peak of the -OH group. A medium-intensity absorption peak at  $2924\text{ cm}^{-1}$  is associated with the antisymmetric stretching vibration of the -CH<sub>2</sub> group in starch. The absorption peak around  $1636\text{ cm}^{-1}$  corresponds to water absorption in the amorphous region of starch. The peak around  $1342\text{ cm}^{-1}$  is attributed to the bending vibration of the C-OH bond and the twisting vibration of the -CH<sub>2</sub> group in starch. The absorption peak near  $1003\text{ cm}^{-1}$  can be assigned to the stretching vibration of the C-O bond and the bending vibration of the C-OH group. These vibrational peak features of normal corn starch are consistent with those from previous studies of starch samples derived from both standard normal and waxy corn<sup>1</sup>. Additionally, the ATR-FTIR spectrum shows no apparent impurity peaks, indicating the high purity of the starch.

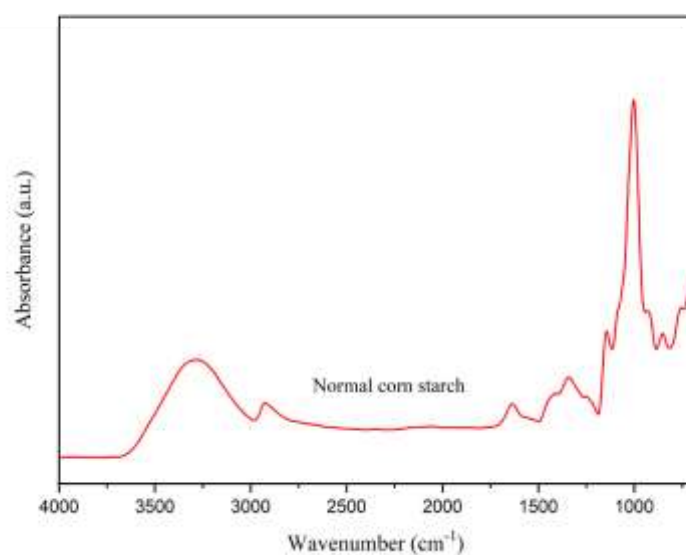

Fig.S1 The ATR-FTIR spectrum of normal corn starch.

[Cho][Lys]:  $^1\text{H}$  NMR (600 MHz):  $\delta$  (ppm) 1.31-1.20 (m, 2H,  $\text{CH}_2\text{CH}_2\text{CH}_2\text{CH}_2\text{NH}_2$ ), 1.41 (t,  $J = 10.3$  Hz, 2H,  $\text{CH}_2\text{CH}_2\text{CH}_2\text{CH}_2\text{NH}_2$ ), 1.59-1.46 (m, 2H,  $\text{CH}_2\text{CH}_2\text{CH}_2\text{CH}_2\text{NH}_2$ ), 2.61 (t,  $J = 7.2$  Hz, 2H,  $\text{CH}_2\text{CH}_2\text{CH}_2\text{CH}_2\text{NH}_2$ ), 3.12 (s, 10H,  $(\text{CH}_3)_3\text{N}$ ,  $\text{CHNH}_2$ ), 3.48-3.39 (m, 2H,  $\text{CH}_2\text{CH}_2\text{OH}$ ), 4.02 -3.91 (m, 2H,  $\text{CH}_2\text{CH}_2\text{N}$ )

A

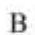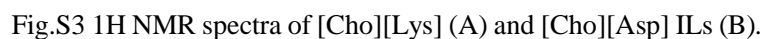

### 3. The insolubility of starch in pure [Cho][Lys] and [Cho][Asp] IL

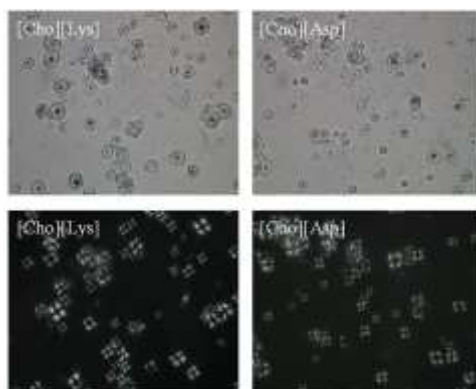

Fig.S4 The dissolution situation of starch granules in pure [Cho][Lys] and [Cho][Asp] at 100 °C for 20 min  
(micrographs: grey vision and polarized light micrographs: black vision).

### 4. The physicochemical properties of [Cho][Lys]-water and [Cho][Asp]-water solvents

#### 4.1 pH values

Table S1 pH values of [Cho][AA]-water solvents with different water/IL (w:IL) ratios.

| Ratios    | pH <sub>[Cho][Lys]</sub>  | pH <sub>[Cho][Asp]</sub> |
|-----------|---------------------------|--------------------------|
| w:IL-10:0 | 6.28 ± 0.01 <sup>g</sup>  | 6.28 ± 0.01 <sup>g</sup> |
| w:IL-9:1  | 11.42 ± 0.01 <sup>f</sup> | 7.40 ± 0.02 <sup>f</sup> |
| w:IL-7:3  | 11.66 ± 0.03 <sup>e</sup> | 7.53 ± 0.04 <sup>e</sup> |
| w:IL-5:5  | 11.86 ± 0.01 <sup>d</sup> | 8.09 ± 0.01 <sup>d</sup> |
| w:IL-4:6  | 12.03 ± 0.04 <sup>c</sup> | 8.26 ± 0.03 <sup>c</sup> |
| w:IL-2:8  | 12.41 ± 0.06 <sup>b</sup> | 9.28 ± 0.05 <sup>b</sup> |

#### 4.2 Apparent viscosity

From Fig.S5 and Table S2, it can be seen that the viscosity of [Cho][Asp]-water mixture at the same ratio was much higher than that of [Cho][Lys]-water mixture. Also, the viscosities of [Cho][Lys]-water and [Cho][Asp]-water solvents decreased significantly with continually water addition or with elevated temperature.

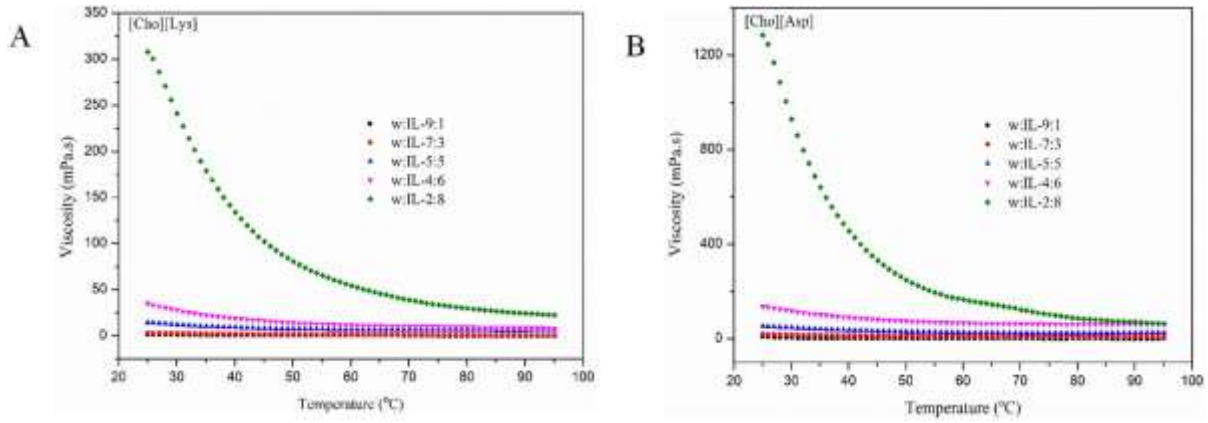

Fig.S5 The effect of temperature on the viscosities of [Cho][Lys]-water (A) and [Cho][Asp]-water (B) solvents.

Table S2 The viscosity values (mPa.s) of [Cho][Lys]-water and [Cho][Asp]-water solvents at 28 °C.

| Ratios   | $\eta$ [Cho][Lys]         | $\eta$ [Cho][Asp]          |
|----------|---------------------------|----------------------------|
| w:IL-9:1 | 1.46±0.02 <sup>e</sup>    | 8.78±0.09 <sup>e</sup>     |
| w:IL-7:3 | 3.24±0.03 <sup>d</sup>    | 19.27±2.01 <sup>d</sup>    |
| w:IL-5:5 | 14.43±1.13 <sup>c</sup>   | 53.09±5.19 <sup>c</sup>    |
| w:IL-4:6 | 35.15±1.68 <sup>b</sup>   | 136.35±11.12 <sup>b</sup>  |
| w:IL-2:8 | 307.99±15.68 <sup>a</sup> | 1283.80±39.01 <sup>a</sup> |

## 5. Molecular characteristics of dissolved starches

The weight average molecular mass ( $M_w$ ), dispersity ( $M_w/M_n$ ) and mean square radius of gyration ( $R_g$ ) of dissolved starches after heating at 100 °C for 20 min were measured and analyzed by a gel permeation chromatography system coupled with a multiangle light scattering detector (632.8 nm, DAWN HELEOS, Wyatt Technology, Santa Barbara, CA, USA) and a refractive index detector (Optilab rex, Wyatt Technology) according to the method of our previous study<sup>2</sup>. Here the molecular features of starch treated with high concentration [Cho][AA] solvents were chosen to understand the degradation effect of [Cho][AA] on starch (Fig.S6). And the  $M_w$ ,  $M_w/M_n$ , and  $R_g$  values of dissolved starches are shown in Table S3. Compared with water, the  $M_w$  values of dissolved starches decreased slightly in [Cho][Asp]-water solvents, and this decrease grew with increasing [Cho][Asp]

concentration. All these molecular features suggest that starch could be moderately depolymerized during heating in [Cho][Asp]-water solvents. While due to the strong basicity of [Cho][Lys] (Table S1), the degradation degrees of starches were more prominent in [Cho][Lys]-water solvents.

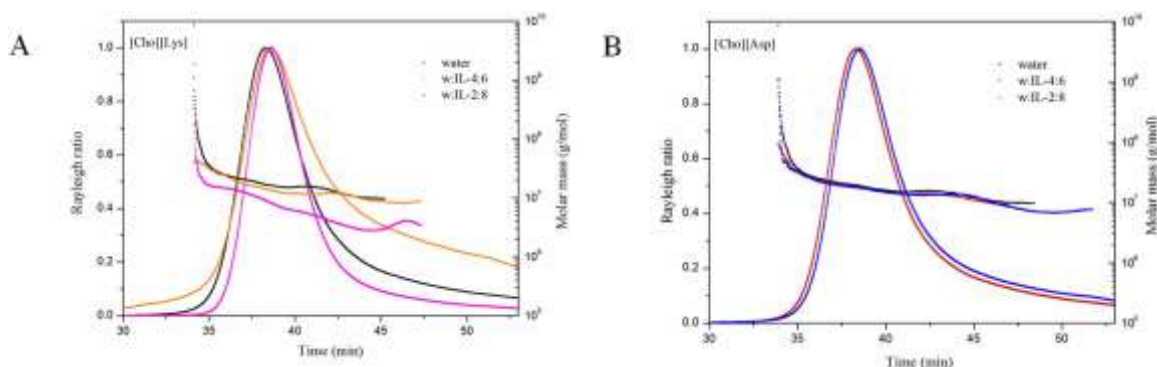

Fig.S6 Molecular characterizations of starches after being heated in [Cho][Lys]-water (A) and [Cho][Asp]-water solvents (B) for 20 min.

Table S3 Weight average molecular mass ( $M_w$ ), dispersity ( $M_w/M_n$ ), and mean square radius of gyration ( $R_g$ ) of dissolved starches.

| Solvents          | $M_w$ (g/mol)              | $M_w/M_n$  | $R_g$ (nm)   |
|-------------------|----------------------------|------------|--------------|
| water             | $1.790 \times 10^7$ (0.9%) | 1.135 (1%) | 106.4 (0.7%) |
| <b>[Cho][Lys]</b> |                            |            |              |
| w:IL-4:6          | $1.189 \times 10^7$ (2%)   | 1.098 (2%) | 161.1 (0.6%) |
| w:IL-2:8          | $8.299 \times 10^6$ (0.6%) | 1.415 (1%) | 74.7 (0.9%)  |
| <b>[Cho][Asp]</b> |                            |            |              |
| w:IL-4:6          | $1.706 \times 10^7$ (0.9%) | 1.113 (1%) | 105.4 (0.7%) |
| w:IL-2:8          | $1.276 \times 10^7$ (0.8%) | 1.158 (2%) | 113.3 (0.6%) |

## References:

1. P. Rubens, J. Snauwaert, K. Heremans and R. Stute, In situ observation of pressure-induced gelation of starches studied with FTIR in the diamond anvil cell, *Carbohydrate Polymers*, 1999, **39**, 231-235.
2. J. Chen, X. Zeng and L. Chen, Regulation nature of water-choline amino acid ionic liquid mixtures on the disaggregation behavior of starch, *Carbohydrate Polymers*, 2021, **272**, 118474.
